# Supplementary material for: Prognostic correlations with the microbiome of breast cancer subtypes
Source: PubMed Central journal article supplement (PMC8418604; doi:10.1038/s41419-021-04092-x), 2021-09-04

Supplementary Figure S1

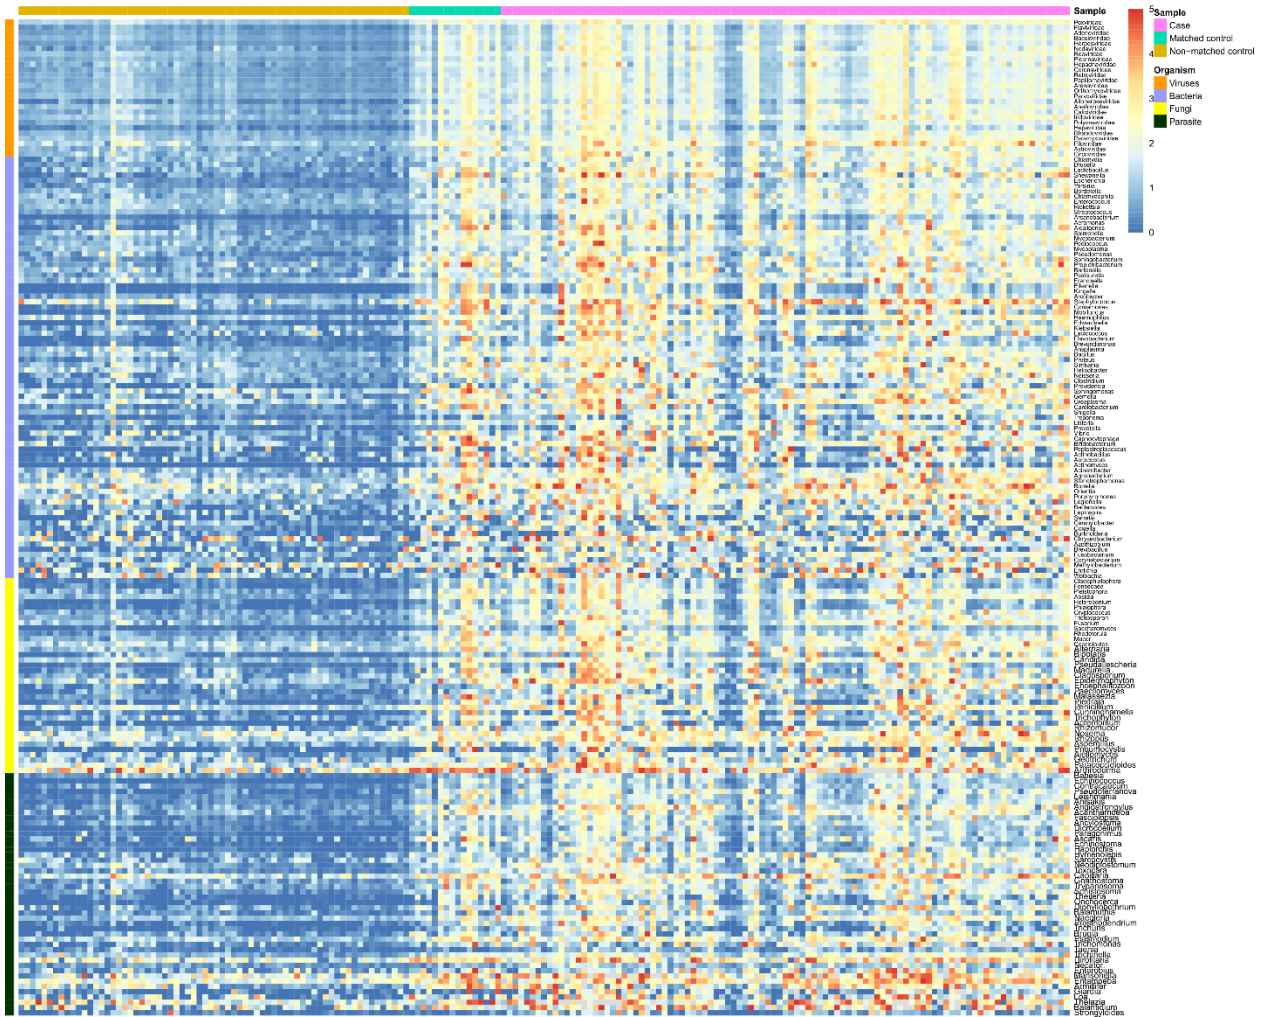





Supplementary Figure S4

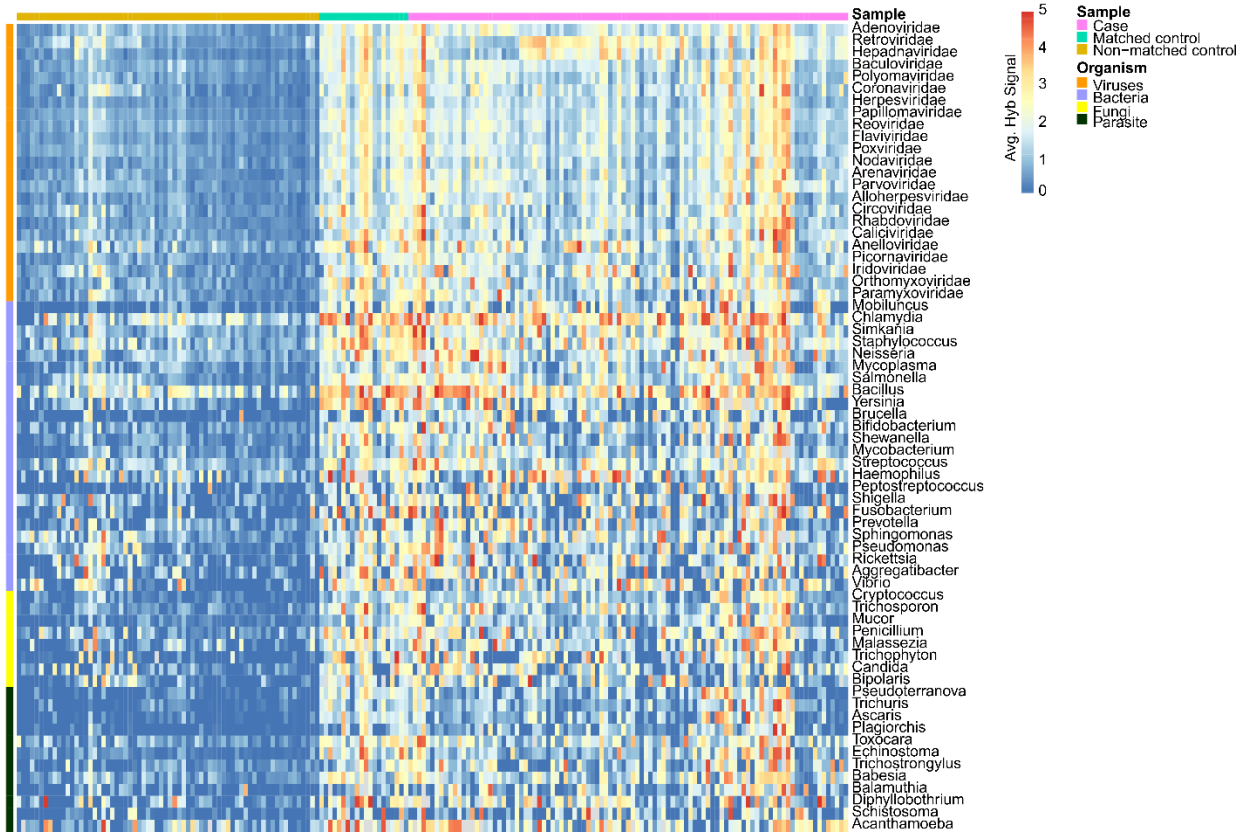

Supplementary Figure S5

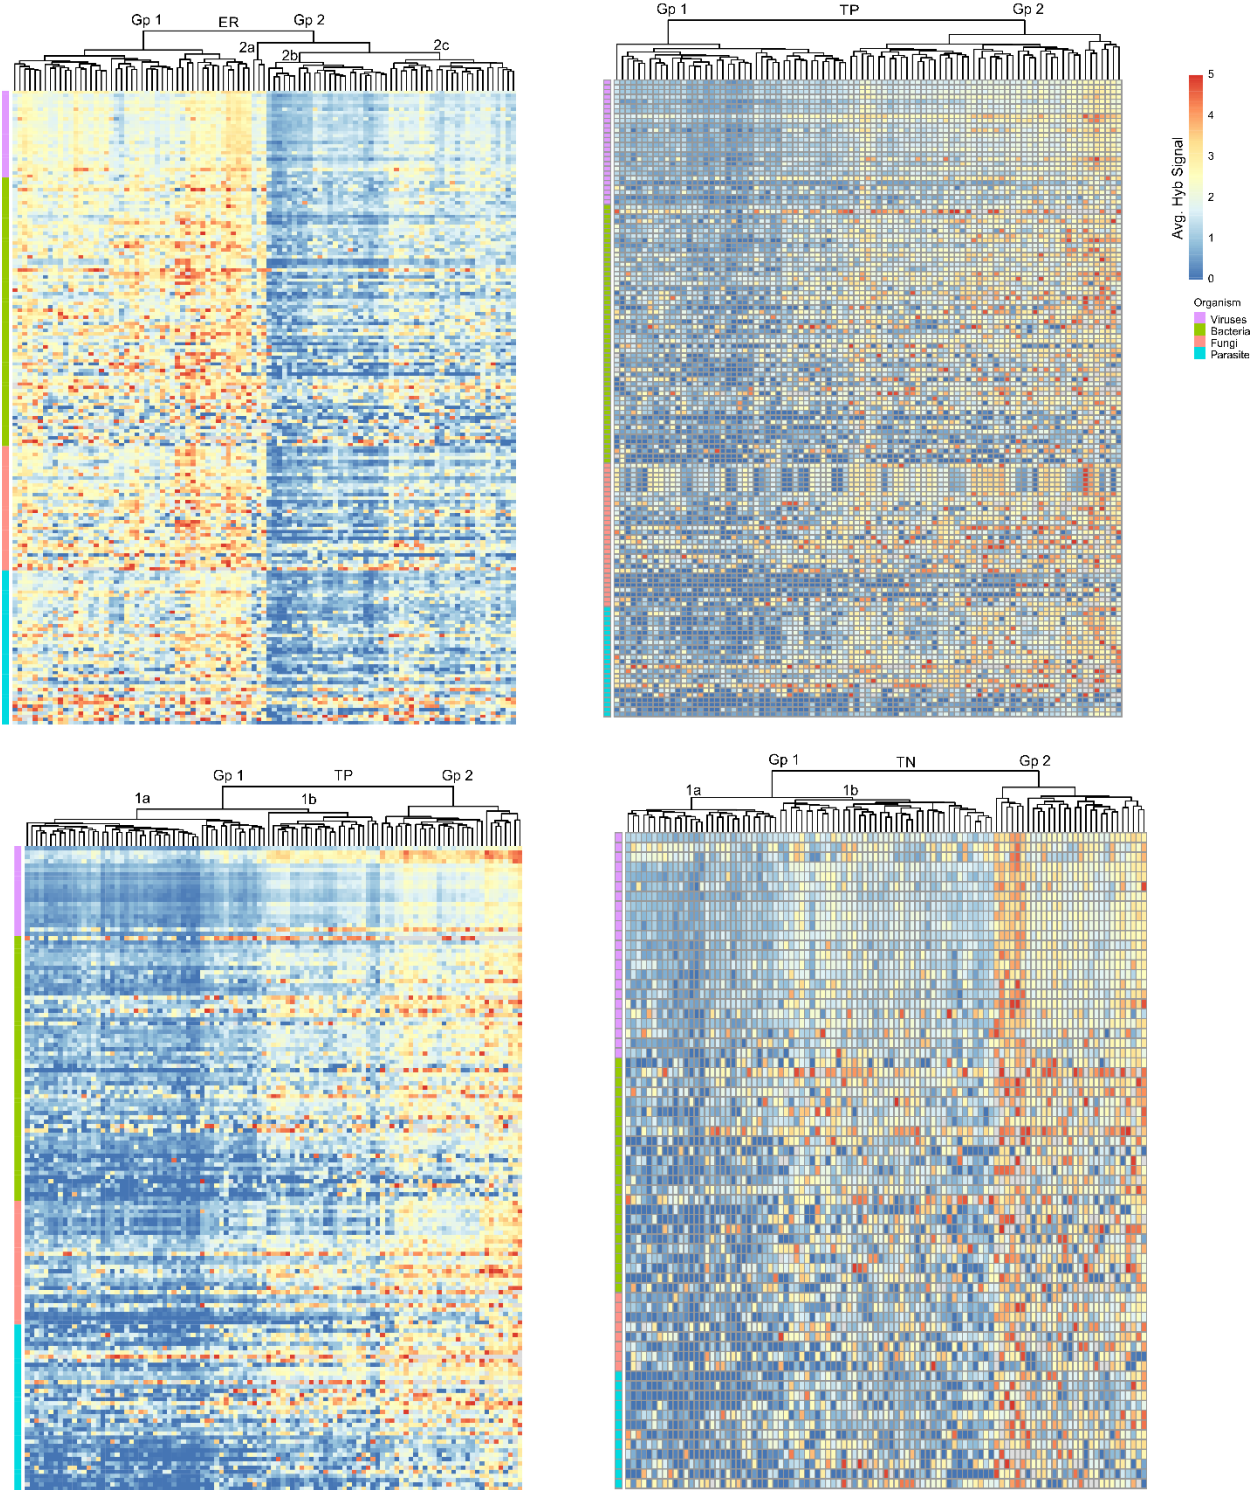

# Supplementary Figure S6

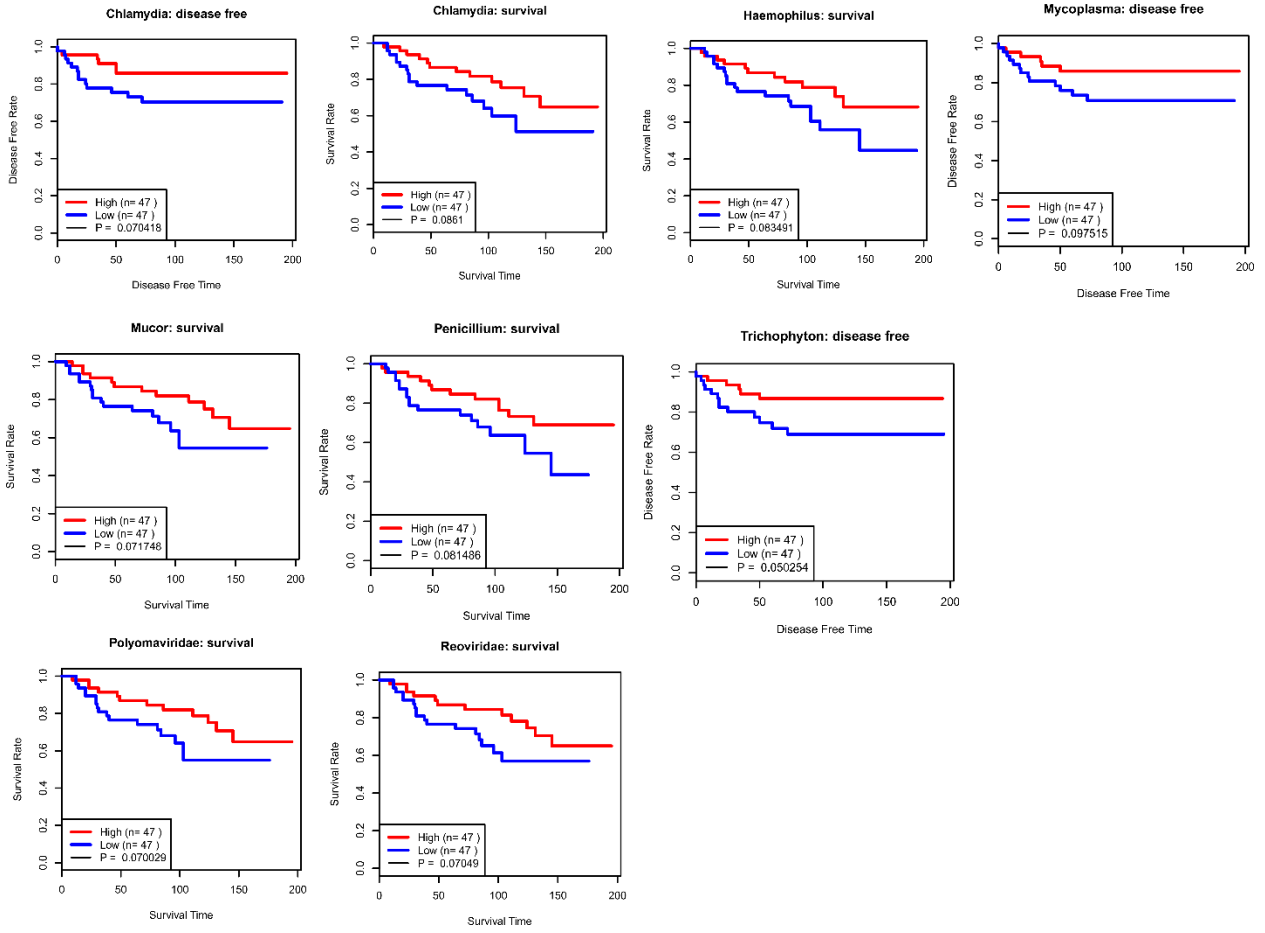

# Supplementary Figure S7

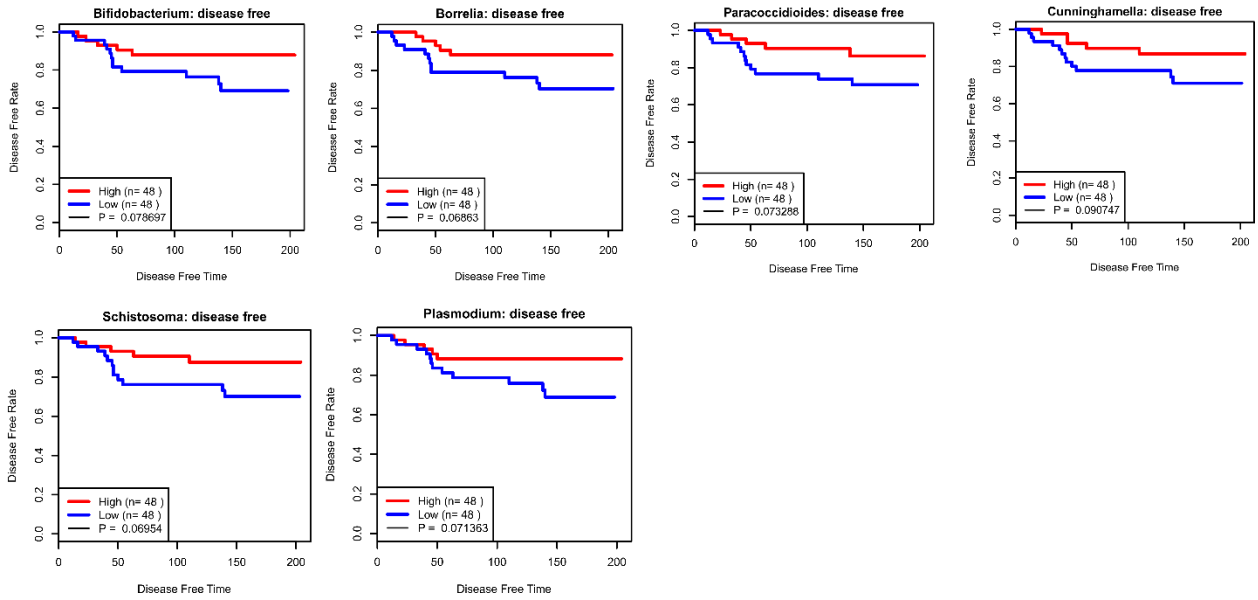

# Supplementary Figure S8

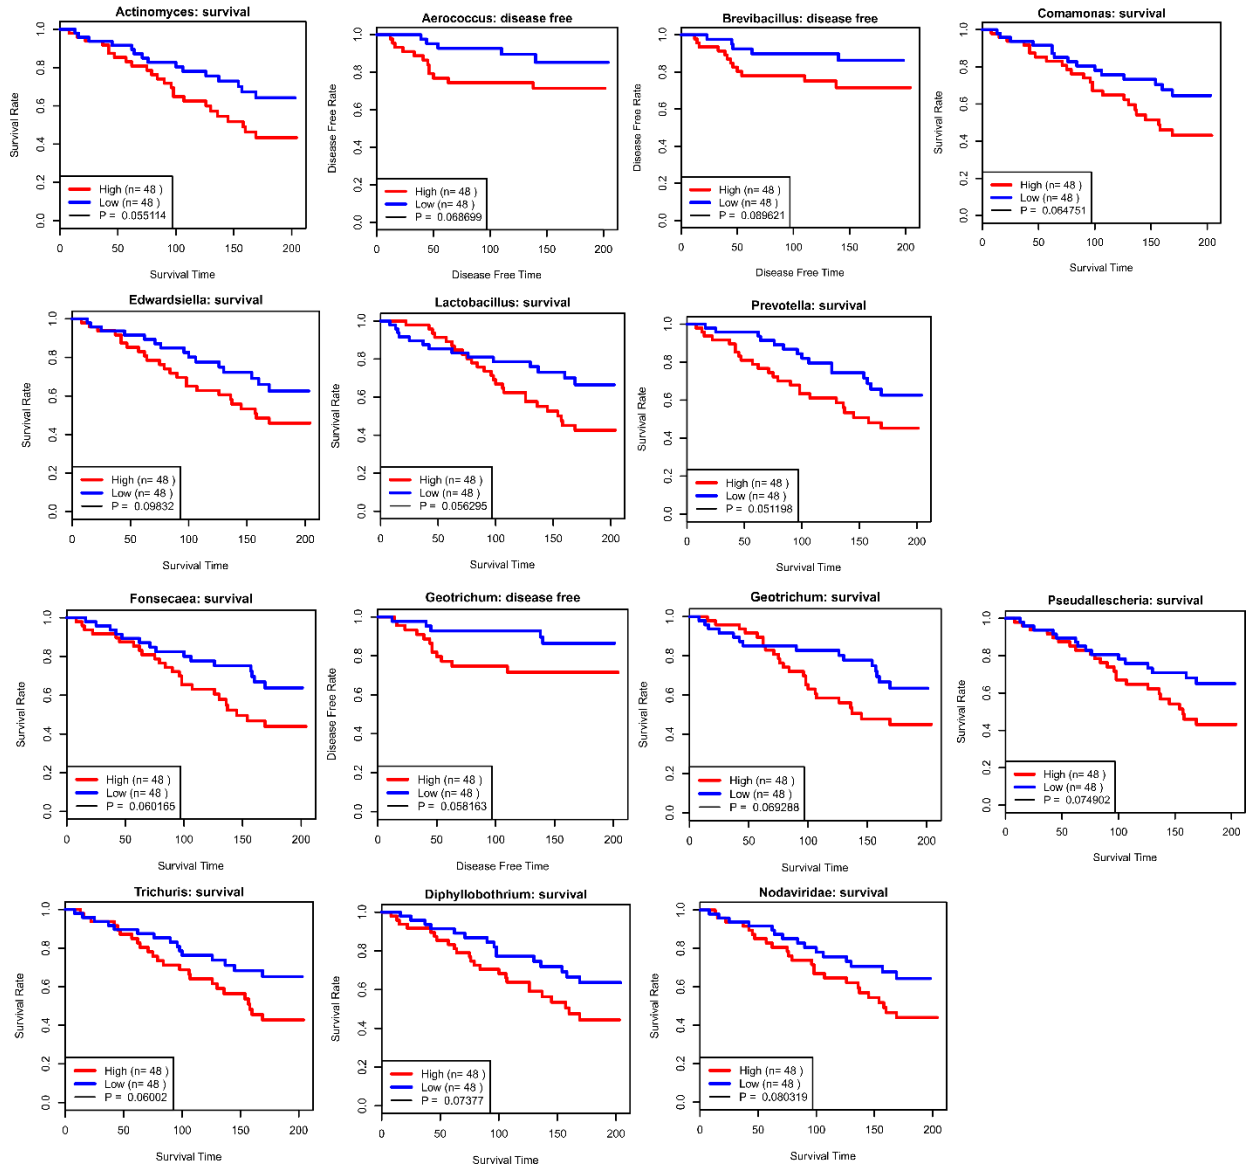



# Supplementary Figure S9

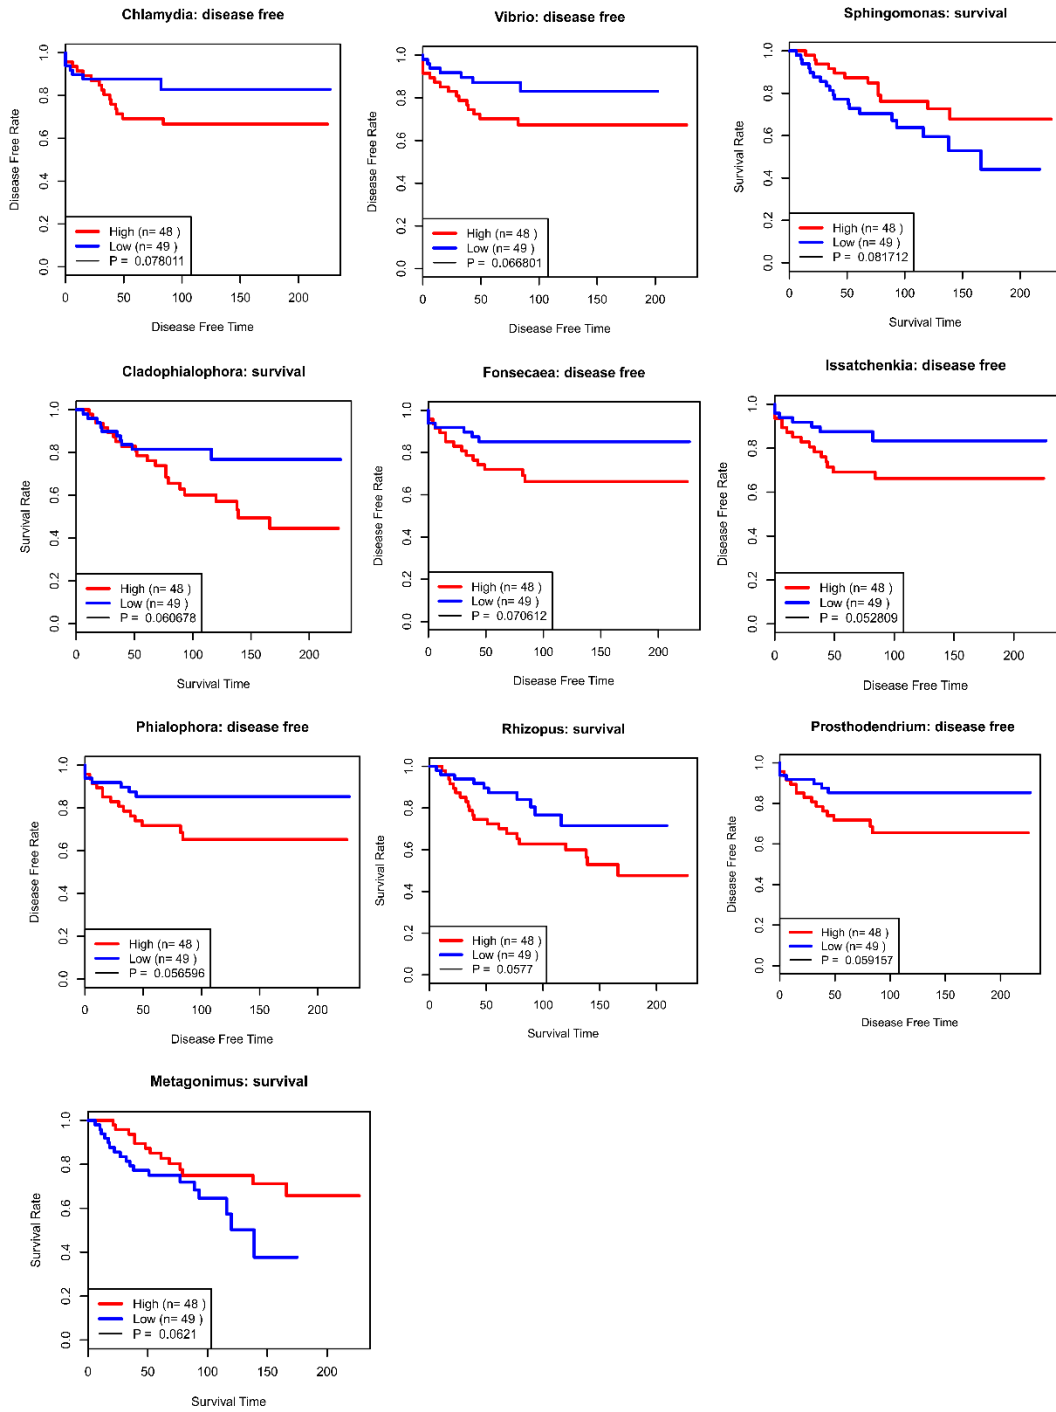

Supplementary Figure S10

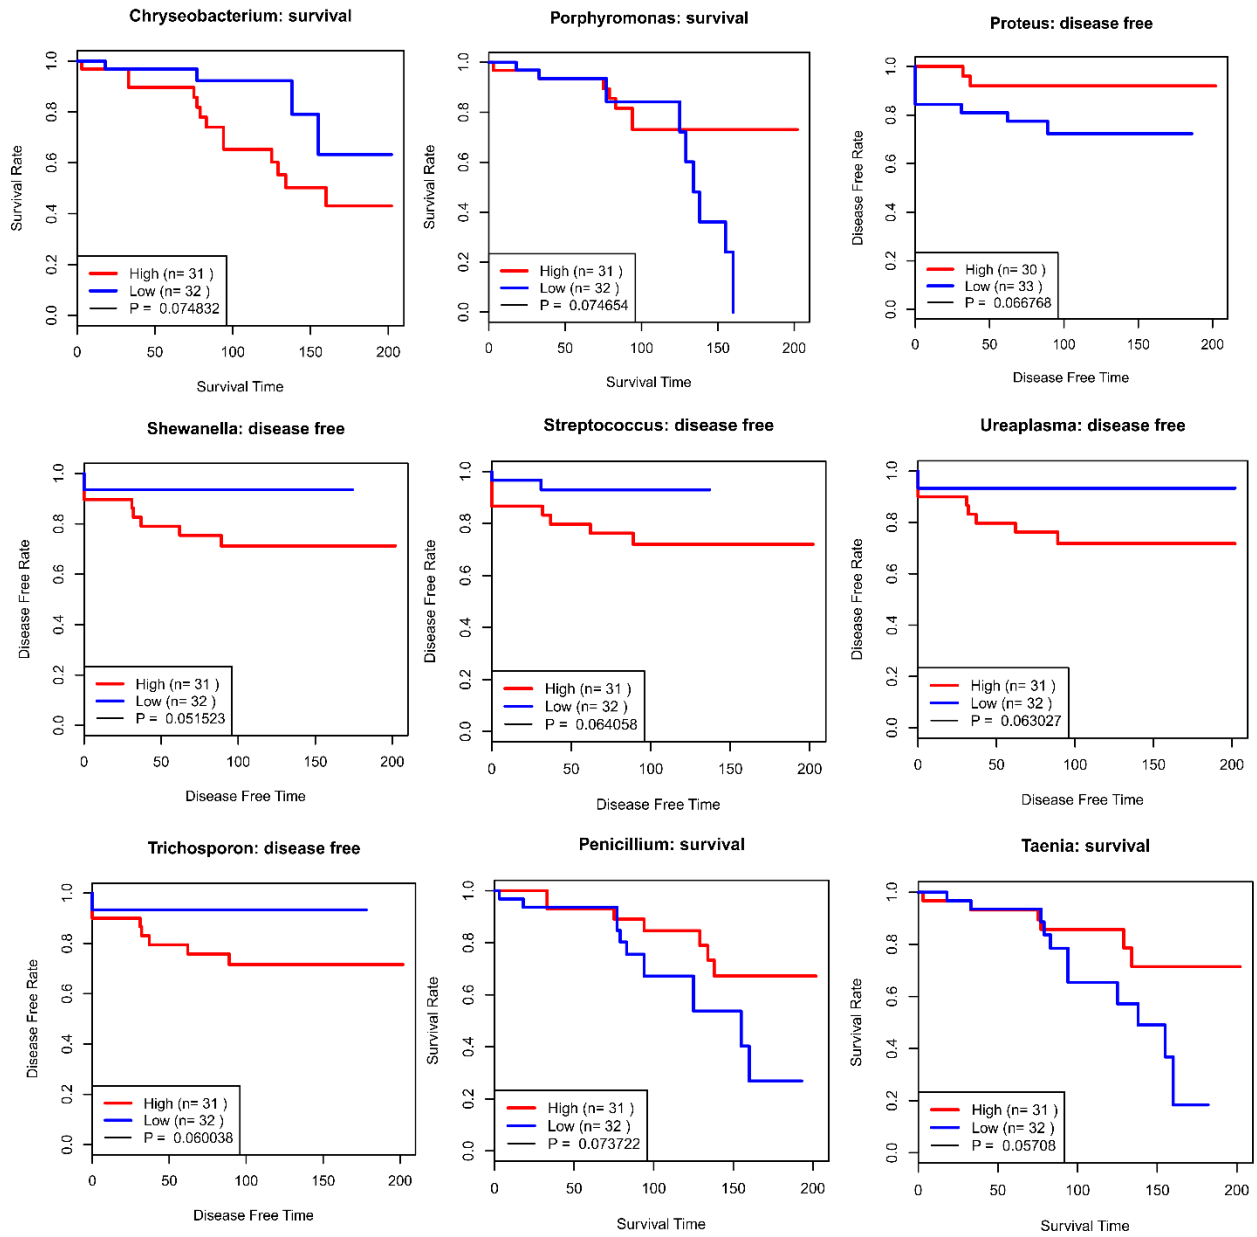

Supplement: 41419_2021_4092_MOESM2_ESM.pdf [file 41419_2021_4092_MOESM2_ESM.pdf]
